# Supplementary material for: Genomewide analysis of the Class III peroxidase gene family in apple (Malus domestica)
Source: PeerJ. 2025 Aug 18;13:e19741. doi: 10.7717/peerj.19741 (PMC12369634; doi:10.7717/peerj.19741)
Supplement: Supplemental Information 1 [file peerj-13-19741-s001.xls]

## Sheet: Sheet1
ITEM TO CHECK	IMPORTANCE	CHECKLIST
EXPERIMENTAL DESIGN
Definition of experimental and control groups	E	p9-p10 line 174-201
Number within each group	E	p9-p10 line 174-201
Assay carried out by core lab or investigator's lab?	D	Investigator's lab
Acknowledgement of authors' contributions	D	Not applicable
SAMPLE
Description	E	p9-p10 line 174-201
Volume/mass of sample processed	D	p9-p10 line 174-201
Microdissection or macrodissection	E	p9-p10 line 174-201
Processing procedure	E	p9-p10 line 174-201
If frozen - how and how quickly?	E	p9-p10 line 174-201
If fixed - with what, how quickly?	E	Not applicable
Sample storage conditions and duration (especially for FFPE samples)	E	p9-p10 line 174-201
NUCLEIC ACID EXTRACTION
Procedure and/or instrumentation	E	p9-p10 line 174-201
Name of kit and details of any modifications	E	p9-p10 line 174-201
Source of additional reagents used	D	Not applicable
Details of DNase or RNAse treatment	E	p9-p10 line 174-201
Contamination assessment (DNA or RNA)	E	p9-p10 line 174-201
Nucleic acid quantification	E	supplemental file
Instrument and method	E	p9-p10 line 174-201
Purity (A260/A280)	D	Not applicable
Yield	D	Not applicable
RNA integrity method/instrument	E	Not applicable
RIN/RQI or Cq of 3' and 5' transcripts	E	Not applicable
Electrophoresis traces	D	Not applicable
Inhibition testing (Cq dilutions, spike or other)	E	supplemental file
REVERSE TRANSCRIPTION
Complete reaction conditions	E	p9-p10 line 174-201
Amount of RNA and reaction volume	E	p9-p10 line 174-201
Priming oligonucleotide (if using GSP) and concentration	E	Not applicable
Reverse transcriptase and concentration	E	p9-p10 line 174-201
Temperature and time	E	p9-p10 line 174-201
Manufacturer of reagents and catalogue numbers	D	p9-p10 line 174-201
Cqs with and without RT	D*	supplemental file
Storage conditions of cDNA	D	p9-p10 line 174-201
qPCR TARGET INFORMATION
If multiplex, efficiency and LOD of each assay.	E	Not applicable
Sequence accession number	E	supplemental file
Location of amplicon	D	supplemental file
Amplicon length	E	supplemental file
In silico specificity screen (BLAST, etc)	E	supplemental file
Pseudogenes, retropseudogenes or other homologs?	D	supplemental file
Sequence alignment	D	supplemental file
Secondary structure analysis of amplicon	D	supplemental file
Location of each primer by exon or intron (if applicable)	E	Not applicable
What splice variants are targeted?	E	Not applicable
qPCR OLIGONUCLEOTIDES
Primer sequences	E	Table S2
RTPrimerDB Identification Number	D	Not applicable
Probe sequences	D**	Not applicable
Location and identity of any modifications	E	p9-p10 line 174-201
Manufacturer of oligonucleotides	D	p9-p10 line 174-201
Purification method	D	p9-p10 line 174-201
qPCR PROTOCOL
Complete reaction conditions	E	p9-p10 line 174-201
Reaction volume and amount of cDNA/DNA	E	p9-p10 line 174-201
Primer, (probe), Mg++ and dNTP concentrations	E	p9-p10 line 174-201
Polymerase identity and concentration	E	p9-p10 line 174-201
Buffer/kit identity and manufacturer	E	p9-p10 line 174-201
Exact chemical constitution of the buffer	D	Not applicable
Additives (SYBR Green I, DMSO, etc.)	E	p9-p10 line 174-201
Manufacturer of plates/tubes and catalog number	D	Not applicable
Complete thermocycling parameters	E	p9-p10 line 174-201
Reaction setup (manual/robotic)	D	Not applicable
Manufacturer of qPCR instrument	E	p9-p10 line 174-201
qPCR VALIDATION
Evidence of optimisation (from gradients)	D	Not applicable
Specificity (gel, sequence, melt, or digest)	E	supplemental file
For SYBR Green I, Cq of the NTC	E	supplemental file
Standard curves with slope and y-intercept	E	supplemental file
PCR efficiency calculated from slope	E	supplemental file
Confidence interval for PCR efficiency or standard error	D	supplemental file
r2 of standard curve	E	supplemental file
Linear dynamic range	E	supplemental file
Cq variation at lower limit	E	supplemental file
Confidence intervals throughout range	D	supplemental file
Evidence for limit of detection	E	supplemental file
If multiplex, efficiency and LOD of each assay.	E	Not applicable
DATA ANALYSIS
qPCR analysis program (source, version)	E	p9-p10 line 174-201
Cq method determination	E	p9-p10 line 174-201
Outlier identification and disposition	E	p9-p10 line 174-201
Results of NTCs	E	p9-p10 line 174-201
Justification of number and choice of reference genes	E	p9-p10 line 174-201
Description of normalisation method	E	p9-p10 line 174-201
Number and concordance of biological replicates	D	p9-p10 line 174-201
Number and stage (RT or qPCR) of technical replicates	E	p9-p10 line 174-201
Repeatability (intra-assay variation)	E	p9-p10 line 174-201
Reproducibility (inter-assay variation, %CV)	D	Not applicable
Power analysis	D	Not applicable
Statistical methods for result significance	E	p9-p10 line 174-201
Software (source, version)	E	p9-p10 line 174-201
Cq or raw data submission using RDML	D	supplemental file
Table 1. MIQE checklist for authors, reviewers and editors. All essential information (E) must be submitted with the manuscript. Desirable
information (D) should be submitted if available. If using primers obtained from RTPrimerDB, information on qPCR target, oligonucleotides,
protocols and validation is available from that source.
*: Assessing the absence of DNA using a no RT assay is essential when first extracting RNA. Once the sample has been validated as
RDNA-free, inclusion of a no-RT control is desirable, but no longer essential.
**: Disclosure of the probe sequence is highly desirable and strongly encouraged. However, since not all commercial pre-designed assay
vendors provide this information, it cannot be an essential requirement. Use of such assays is advised against.
