# Supplementary material for: Genomewide analysis of the Class III peroxidase gene family in apple (Malus domestica)
Source: PeerJ. 2025 Aug 18;13:e19741. doi: 10.7717/peerj.19741 (PMC12369634; doi:10.7717/peerj.19741)
Supplement: Supplemental Information 2 [file peerj-13-19741-s002.xlsx]

## Sheet: Sheet1
Color	Position	Sample Name	Gene Name	Cq	Concentration	Call	Excluded	Sample Type	Standard	Cq Mean	Cq Error	Concentration Mean	Concentration Error	Replicate Group	Dye	Edited Call	Slope	EPF	Failure	Notes	Sample Prep Notes	Number
255;132;197;238	A1	WB3	18S	4.75	-	Positive	Unchecked	Unknown	-	4.85	0.15	-	-	A1	SYBR Green I		0.34	1.92	None			1
255;132;197;238	A2	WB3	18S	5.02	-	Positive	Unchecked	Unknown	-	4.85	0.15	-	-	A1	SYBR Green I		0.34	1.89	None			2
255;132;197;238	A3	WB3	18S	4.79	-	Positive	Unchecked	Unknown	-	4.85	0.15	-	-	A1	SYBR Green I		0.35	1.96	None			3
255;250;215;15	A4	WB3	X86	30	-	Positive	Unchecked	Unknown	-	29.96	0.14	-	-	A4	SYBR Green I		0.31	1.79	None			4
255;250;215;15	A5	WB3	X86	30.07	-	Positive	Unchecked	Unknown	-	29.96	0.14	-	-	A4	SYBR Green I		0.34	1.95	None			5
255;250;215;15	A6	WB3	X86	29.8	-	Positive	Unchecked	Unknown	-	29.96	0.14	-	-	A4	SYBR Green I		0.34	1.95	None			6
255;66;41;24	B1	WB3-1	18S	6.36	-	Positive	Unchecked	Unknown	-	6.37	0.07	-	-	B1	SYBR Green I		0.45	2.2	None			7
255;66;41;24	B2	WB3-1	18S	6.45	-	Positive	Unchecked	Unknown	-	6.37	0.07	-	-	B1	SYBR Green I		0.43	2.11	None			8
255;66;41;24	B3	WB3-1	18S	6.31	-	Positive	Unchecked	Unknown	-	6.37	0.07	-	-	B1	SYBR Green I		0.46	2.24	None			9
255;242;138;21	B4	WB3-1	X86	30.93	-	Positive	Unchecked	Unknown	-	30.86	0.09	-	-	B4	SYBR Green I		0.39	2	None			10
255;242;138;21	B5	WB3-1	X86	30.88	-	Positive	Unchecked	Unknown	-	30.86	0.09	-	-	B4	SYBR Green I		0.41	2.1	None			11
255;242;138;21	B6	WB3-1	X86	30.76	-	Positive	Unchecked	Unknown	-	30.86	0.09	-	-	B4	SYBR Green I		0.39	2.07	None			12
255;234;79;79	C1	WB3-2	18S	7.77	-	Positive	Unchecked	Unknown	-	7.81	0.08	-	-	C1	SYBR Green I		0.51	2.32	None			13
255;234;79;79	C2	WB3-2	18S	7.91	-	Positive	Unchecked	Unknown	-	7.81	0.08	-	-	C1	SYBR Green I		0.48	2.19	None			14
255;234;79;79	C3	WB3-2	18S	7.76	-	Positive	Unchecked	Unknown	-	7.81	0.08	-	-	C1	SYBR Green I		0.54	2.4	None			15
255;103;103;103	C4	WB3-2	X86	33.04	-	Positive	Unchecked	Unknown	-	32.98	0.94	-	-	C4	SYBR Green I		0.4	1.96	None			16
255;103;103;103	C5	WB3-2	X86	32.02	-	Positive	Unchecked	Unknown	-	32.98	0.94	-	-	C4	SYBR Green I		0.44	2.16	None			17
255;103;103;103	C6	WB3-2	X86	33.89	-	Positive	Unchecked	Unknown	-	32.98	0.94	-	-	C4	SYBR Green I		0.41	1.95	None			18
255;47;73;113	D1	WB3-3	18S	9.34	-	Positive	Unchecked	Unknown	-	9.34	0.07	-	-	D1	SYBR Green I		0.55	2.43	None			19
255;47;73;113	D2	WB3-3	18S	9.41	-	Positive	Unchecked	Unknown	-	9.34	0.07	-	-	D1	SYBR Green I		0.52	2.33	None			20
255;47;73;113	D3	WB3-3	18S	9.28	-	Positive	Unchecked	Unknown	-	9.34	0.07	-	-	D1	SYBR Green I		0.58	2.52	None			21
255;132;197;238	D4	WB3-3	X86	34.53	-	Positive	Unchecked	Unknown	-	34.81	0.4	-	-	D4	SYBR Green I		0.42	1.91	None			22
255;132;197;238	D5	WB3-3	X86	35.27	-	Positive	Unchecked	Unknown	-	34.81	0.4	-	-	D4	SYBR Green I		0.46	2.02	None			23
255;132;197;238	D6	WB3-3	X86	34.63	-	Positive	Unchecked	Unknown	-	34.81	0.4	-	-	D4	SYBR Green I		0.4	1.89	None			24
255;34;176;146	E1	WB3-4	18S	11.87	-	Positive	Unchecked	Unknown	-	11.51	0.31	-	-	E1	SYBR Green I		0.39	2.02	None			25
255;34;176;146	E2	WB3-4	18S	11.3	-	Positive	Unchecked	Unknown	-	11.51	0.31	-	-	E1	SYBR Green I		0.58	2.49	None			26
255;34;176;146	E3	WB3-4	18S	11.37	-	Positive	Unchecked	Unknown	-	11.51	0.31	-	-	E1	SYBR Green I		0.49	2.24	None			27
255;66;41;24	E4	WB3-4	X86	37.53	-	Negative	Unchecked	Unknown	-	37.53	0.02	-	-	E4	SYBR Green I		0	-0.02	Replicate group contains positives and negatives.			28
255;66;41;24	E5	WB3-4	X86	37.51	-	Positive	Unchecked	Unknown	-	37.53	0.02	-	-	E4	SYBR Green I		0.39	1.76	Replicate group contains positives and negatives.			29
255;66;41;24	E6	WB3-4	X86	37.54	-	Positive	Unchecked	Unknown	-	37.53	0.02	-	-	E4	SYBR Green I		0.41	1.84	Replicate group contains positives and negatives.			30
255;205;18;55	F1	WB3-5	18S	13.32	-	Positive	Unchecked	Unknown	-	13.41	0.18	-	-	F1	SYBR Green I		0.57	2.44	None			31
255;205;18;55	F2	WB3-5	18S	13.3	-	Positive	Unchecked	Unknown	-	13.41	0.18	-	-	F1	SYBR Green I		0.55	2.38	None			32
255;205;18;55	F3	WB3-5	18S	13.62	-	Positive	Unchecked	Unknown	-	13.41	0.18	-	-	F1	SYBR Green I		0.48	2.28	None			33
255;234;79;79	F4	WB3-5	X86	-	-	Positive	Unchecked	Unknown	-	-	-	-	-	F4	SYBR Green I		0.01	1.52	None			34
255;234;79;79	F5	WB3-5	X86	-	-	Negative	Unchecked	Unknown	-	-	-	-	-	F4	SYBR Green I		0.01	0.06	None			35
255;234;79;79	F6	WB3-5	X86	-	-	Negative	Unchecked	Unknown	-	-	-	-	-	F4	SYBR Green I		0.01	0.07	None			36
255;95;103;174	G1	WB3-6	18S	15.23	-	Positive	Unchecked	Unknown	-	15.16	0.09	-	-	G1	SYBR Green I		0.54	2.36	None			37
255;95;103;174	G2	WB3-6	18S	15.19	-	Positive	Unchecked	Unknown	-	15.16	0.09	-	-	G1	SYBR Green I		0.54	2.35	None			38
255;95;103;174	G3	WB3-6	18S	15.05	-	Positive	Unchecked	Unknown	-	15.16	0.09	-	-	G1	SYBR Green I		0.13	1.71	None			39
255;47;73;113	G4	WB3-6	X86	-	-	Negative	Unchecked	Unknown	-	-	-	-	-	G4	SYBR Green I		0.01	0.04	None			40
255;47;73;113	G5	WB3-6	X86	-	-	Negative	Unchecked	Unknown	-	-	-	-	-	G4	SYBR Green I		0.01	0.06	None			41
255;47;73;113	G6	WB3-6	X86	-	-	Negative	Unchecked	Unknown	-	-	-	-	-	G4	SYBR Green I		0.01	0.04	None			42
255;180;73;149	H1	水	18S	-	-	Positive	Unchecked	Unknown	-	-	-	-	-	H1	SYBR Green I		0	0	None			43
255;180;73;149	H2	水	18S	-	-	Positive	Unchecked	Unknown	-	-	-	-	-	H1	SYBR Green I		0.01	0.05	None			44
255;180;73;149	H3	水	18S	-	-	Positive	Unchecked	Unknown	-	-	-	-	-	H1	SYBR Green I		0.02	0.08	None			45
255;34;176;146	H4	水	X86	-	-	Negative	Unchecked	Unknown	-	-	-	-	-	H4	SYBR Green I		0.01	0.06	None			46
255;34;176;146	H5	水	X86	-	-	Negative	Unchecked	Unknown	-	-	-	-	-	H4	SYBR Green I		0.01	0.07	None			47
255;34;176;146	H6	水	X86	-	-	Negative	Unchecked	Unknown	-	-	-	-	-	H4	SYBR Green I		0	0	None			48
