# Supplementary material for: Genomewide analysis of the Class III peroxidase gene family in apple (Malus domestica)
Source: PeerJ. 2025 Aug 18;13:e19741. doi: 10.7717/peerj.19741 (PMC12369634; doi:10.7717/peerj.19741)
Supplement: Supplemental Information 5 [file peerj-13-19741-s005.xlsx]

## Sheet:  
Seq_1	Seq_2	Ka	Ks	Ka_Ks	Divergence time(Mya)
MdPRX1	MD01G1191600	0.594858	2.2758	0.261384	75.8601
MdPRX10	MdPRX85	0.0435398	0.202663	0.214838	6.75544
MdPRX10	MdPRX81	0.362068	1.67228	0.216512	55.7425
MdPRX13	MdPRX59	0.318512	3.33489	0.0955089	111.163
MdPRX19	MdPRX28	0.225207	3.13251	0.0718934	104.417
MdPRX19	MdPRX66	0.230435	2.68972	0.0856725	89.6573
MdPRX20	MdPRX62	0.223557	1.14738	0.194841	38.2461
MdPRX21	MdPRX39	0.202956	1.614	0.125747	53.8001
MdPRX24	MdPRX65	0.0358088	0.168155	0.212952	5.60516
MdPRX27	MD12G1121300	0.250997	0.479121	0.523869	15.9707
MdPRX28	MdPRX61	0.211983	3.48835	0.0607688	116.278
MdPRX28	MdPRX66	0.0338165	0.159813	0.2116	5.32712
MdPRX31	MdPRX54	0.0680509	0.256534	0.265271	8.55112
MdPRX32	MdPRX56	0.0390681	0.108413	0.360362	3.61378
MdPRX34	MdPRX57	0.0154013	0.134504	0.114504	4.48347
MdPRX36	MdPRX91	0.293791	2.2123	0.132799	73.7434
MdPRX36	MdPRX72	0.323573	2.28124	0.141841	76.0414
MdPRX36	MdPRX96	0.300197	1.73747	0.172778	57.9158
MdPRX36	MdPRX50	0.313071	1.65666	0.188977	55.222
MdPRX36	MdPRX80	0.0814383	0.206486	0.394401	6.88287
MdPRX38	MdPRX67	0.255767	3.00344	0.085158	100.115
MdPRX39	MdPRX64	0.203692	2.1581	0.0943849	71.9367
MdPRX50	MdPRX80	0.301708	1.87416	0.160983	62.4719
MdPRX50	MdPRX96	0.0316561	0.157744	0.20068	5.25813
MdPRX51	MdPRX98	0.0415859	0.139018	0.29914	4.63394
MdPRX6	MdPRX28	0.298173	3.3548	0.0888794	111.827
MdPRX6	MdPRX88	0.102922	0.70732	0.145511	23.5773
MdPRX6	MdPRX63	0.353481	1.77806	0.198802	59.2686
MdPRX71	MdPRX90	0.046906	0.164102	0.285834	5.47007
MdPRX72	MdPRX80	0.332576	2.56259	0.129781	85.4197
MdPRX72	MdPRX91	0.086018	0.273389	0.314635	9.11298
MdPRX73	MdPRX92	0.252169	0.939357	0.268448	31.3119
MdPRX75	MdPRX94	0.0835854	0.192127	0.435054	6.40422
MdPRX76	MdPRX95	0.0402595	0.136633	0.294653	4.55445
MdPRX77	MdPRX91	0.0866928	0.143171	0.605519	4.77237
MdPRX80	MdPRX85	0.316904	1.89045	0.167634	63.0151
MdPRX80	MdPRX96	0.304961	1.72807	0.176475	57.6023
MdPRX81	MdPRX19	0.351094	1.86004	0.188757	62.0012
MdPRX9	MdPRX28	0.0606246	0.200769	0.301962	6.69231
