# Supplementary material for: Genomewide analysis of the Class III peroxidase gene family in apple (Malus domestica)
Source: PeerJ. 2025 Aug 18;13:e19741. doi: 10.7717/peerj.19741 (PMC12369634; doi:10.7717/peerj.19741)
Supplement: Supplemental Information 6 [file peerj-13-19741-s006.xls]

## Sheet: Additional File4The predicted M
Sequence ID	MdPRX ID	aa number	MW	pI	Hydropathicity		subcellular localization
MD01G1034400	MdPRX1	337	37397.9	5.89	-0.127		chlo
MD01G1034500	MdPRX2	327	36381	7.55	-0.051		extr
MD01G1034900	MdPRX3	328	36260.4	5.01	-0.019		vacu
MD01G1162100	MdPRX4	342	37255.5	8.24	-0.025		chlo
MD01G1162400	MdPRX5	318	34416.2	8.81	-0.064		extr
MD01G1162700	MdPRX6	319	34241.3	9.19	-0.255		chlo
MD01G1193700	MdPRX7	359	39762.3	8.93	-0.054		chlo
MD01G1194000	MdPRX8	328	36073.2	8.56	-0.07		chlo
MD02G1124700	MdPRX9	318	34309	9.26	-0.148		extr
MD02G1138900	MdPRX10	331	36421.6	9.13	-0.205		extr
MD03G1012800	MdPRX11	300	32013.5	4.32	-0.09		chlo
MD03G1012900	MdPRX12	309	32818.6	4.03	0.005		extr
MD03G1013200	MdPRX13	351	37394.7	4.49	0.013		extr
MD03G1013600	MdPRX14	351	37183.6	4.56	0.023		extr
MD03G1013900	MdPRX15	262	28673.3	6.43	-0.281		plas
MD03G1014200	MdPRX16	324	34890.6	4.6	-0.208		chlo
MD03G1014400	MdPRX17	324	34874.6	4.56	-0.199		chlo
MD03G1014500	MdPRX18	331	35673.7	8.06	0.091		chlo
MD03G1058900	MdPRX19	383	41807.8	9.21	0.002		mito
MD03G1059000	MdPRX20	330	35876.6	6.21	-0.152		chlo
MD03G1059200	MdPRX21	349	37696.9	9.19	-0.14		chlo
MD03G1084400	MdPRX22	162	17702.1	9.07	-0.286		chlo
MD03G1147900	MdPRX23	336	36162	5.75	-0.079		chlo
MD03G1223300	MdPRX24	315	34457.3	5.88	-0.137		chlo
MD03G1274500	MdPRX25	324	35539.6	7.96	-0.098		extr
MD04G1046400	MdPRX26	341	38499.1	8.73	-0.292		chlo
MD04G1101700	MdPRX27	328	36622.6	5.6	-0.25		chlo
MD04G1170900	MdPRX28	324	33920.1	8.36	0.021		extr
MD04G1211800	MdPRX29	305	33075.7	8.61	-0.169		cyto
MD05G1075100	MdPRX30	333	36545.8	7.49	-0.051		extr
MD05G1224400	MdPRX31	400	43925.7	5.78	-0.282		vacu
MD05G1243700	MdPRX32	356	39418.5	5.38	-0.241		extr
MD05G1306500	MdPRX33	353	38596.2	9.06	-0.105		chlo
MD05G1345800	MdPRX34	335	38233.7	8.3	-0.425		vacu
MD06G1038800	MdPRX35	415	46839	8.16	-0.059		chlo
MD06G1180500	MdPRX36	325	35866	6	-0.136		extr
MD06G1180700	MdPRX37	325	35996.2	8.05	-0.133		extr
MD07G1230500	MdPRX38	336	36300.5	9.1	-0.081		chlo
MD07G1230700	MdPRX39	319	34454	9.47	-0.282		chlo
MD07G1230900	MdPRX40	329	36037.4	9.14	-0.127		vacu
MD07G1301400	MdPRX41	331	36224.4	9.63	-0.174		chlo
MD08G1027800	MdPRX42	322	34919.9	8.63	-0.018		vacu
MD08G1051200	MdPRX43	329	35395	5.19	-0.002		extr
MD08G1222600	MdPRX44	321	34676.6	5.1	0.105		extr
MD08G1230700	MdPRX45	327	35465.4	8.57	-0.075		chlo
MD08G1230800	MdPRX46	333	36079.1	8.78	-0.063		chlo
MD08G1230900	MdPRX47	331	36195.4	9.03	-0.075		chlo
MD09G1009900	MdPRX48	219	23346.5	5.5	0.006		cyto
MD09G1010000	MdPRX49	341	37193.3	6.45	-0.118		chlo
MD09G1039100	MdPRX50	327	35851.9	8.73	-0.097		chlo
MD09G1105900	MdPRX51	326	35458.6	8.91	-0.07		extr
MD09G1106000	MdPRX52	327	35694	9.02	-0.1		extr
MD10G1033300	MdPRX53	349	37945.8	5.32	-0.16		extr
MD10G1206100	MdPRX54	397	43978.7	6.96	-0.407		vacu
MD10G1218200	MdPRX55	347	38598.7	9.21	-0.12		extr
MD10G1225600	MdPRX56	356	39543.7	5.47	-0.261		chlo
MD10G1321200	MdPRX57	337	38446	8.3	-0.436		vacu
MD11G1004100	MdPRX58	358	38861.3	8.79	0.051		chlo
MD11G1015300	MdPRX59	324	34867.5	4.59	-0.214		chlo
MD11G1015400	MdPRX60	332	35490.2	6.88	0.05		chlo
MD11G1060900	MdPRX61	319	34515	8.06	-0.038		chlo
MD11G1061000	MdPRX62	320	34844.8	8.55	-0.024		chlo
MD11G1061200	MdPRX63	322	35063.2	9.24	-0.199		chlo
MD11G1061400	MdPRX64	327	34936.7	9.3	-0.138		chlo
MD11G1241100	MdPRX65	315	34387.4	8.06	-0.102		chlo
MD12G1184600	MdPRX66	323	34037.4	9.15	-0.098		chlo
MD12G1184700	MdPRX67	223	23923	8.23	-0.064		chlo
MD12G1201400	MdPRX68	327	35433.6	8.7	-0.172		chlo
MD13G1011000	MdPRX69	327	35065.7	6.89	-0.06		chlo
MD13G1011200	MdPRX70	328	35260.9	7.55	-0.066		chlo
MD13G1053000	MdPRX71	338	36866	4.75	-0.014		vacu
MD13G1086200	MdPRX72	333	36629.8	6.49	0.002		extr
MD13G1097600	MdPRX73	339	37120.2	5.03	-0.117		cyto
MD13G1097700	MdPRX74	339	37149.6	5.27	-0.058		extr
MD13G1150600	MdPRX75	335	35881.4	4.37	-0.016		extr
MD13G1152800	MdPRX76	324	35018.2	5.64	0.122		E.R.
MD13G1175300	MdPRX77	310	33967.8	6.53	-0.103		extr
MD13G1246700	MdPRX78	326	35773.7	9.05	-0.189		extr
MD14G1010300	MdPRX79	322	34585.5	8.9	-0.012		chlo
MD14G1185700	MdPRX80	643	70893.1	7	-0.164		plas
MD15G1022200	MdPRX81	361	38944.1	9	-0.2		vacu
MD15G1108300	MdPRX82	345	38645.4	9.39	-0.212		chlo
MD15G1172800	MdPRX83	321	34599.5	8.06	-0.089		extr
MD15G1238800	MdPRX84	318	34472.3	9.37	-0.109		extr
MD15G1252300	MdPRX85	358	39228.8	9.28	-0.213		chlo
MD15G1279900	MdPRX86	328	35955.9	6.43	-0.111		extr
MD15G1294200	MdPRX87	314	34009.8	8.28	-0.108		chlo
MD15G1321200	MdPRX88	337	37268.6	4.9	0.005		vacu
MD15G1321300	MdPRX89	360	39630.7	5.89	-0.051		chlo
MD16G1052000	MdPRX90	341	37195.5	4.71	0.071		extr
MD16G1085600	MdPRX91	361	39868.3	8.54	-0.253		chlo
MD16G1098700	MdPRX92	340	37559.1	8.32	-0.139		chlo
MD16G1098800	MdPRX93	336	36705.4	8.32	-0.04		chlo
MD16G1153200	MdPRX94	324	34969.1	5.39	0.144		extr
MD16G1177000	MdPRX95	327	35718.9	8.54	-0.032		chlo
MD17G1040100	MdPRX96	327	35771.7	6.99	-0.128		chlo
MD17G1092400	MdPRX97	325	35386.4	8.66	-0.13		extr							m
MD17G1093600	MdPRX98	326	35422.2	8.68	-0.172		extr
MD17G1265300	MdPRX99	314	34047.3	5.54	-0.058		extr
