# Supplementary material for: Genomewide analysis of the Class III peroxidase gene family in apple (Malus domestica)
Source: PeerJ. 2025 Aug 18;13:e19741. doi: 10.7717/peerj.19741 (PMC12369634; doi:10.7717/peerj.19741)
Supplement: Supplemental Information 7 [file peerj-13-19741-s007.xls]

## Sheet: targetP
# TargetP-2.0	Organism: Plant	Timestamp: 20250208042141
# ID	Prediction	OTHER	SP	mTP	cTP	lTP	CS Position
MdPRX1	SP	0.000681	0.999314	4e-06	0	0	CS pos: 21-22. VPA-AQ. Pr: 0.3905
MdPRX2	SP	0.096126	0.876739	0.027014	4.8e-05	7.3e-05	CS pos: 18-19. ATA-QL. Pr: 0.8382
MdPRX3	SP	0.085987	0.905438	0.00759	0.000197	0.000787	CS pos: 19-20. AVA-QL. Pr: 0.5264
MdPRX4	OTHER	0.843121	0.140416	0.01306	0.000577	0.002826
MdPRX5	SP	0.001832	0.998147	7e-06	3e-06	1.1e-05	CS pos: 23-24. SNC-KL. Pr: 0.8726
MdPRX6	SP	0.000686	0.979213	0.009012	0.010865	0.000224	CS pos: 23-24. TSA-QL. Pr: 0.7933
MdPRX7	SP	0.001626	0.997741	0.00062	3e-06	1e-05	CS pos: 30-31. SKA-AL. Pr: 0.5191
MdPRX8	SP	0.000723	0.998688	0.000518	1e-05	6.2e-05	CS pos: 30-31. SKA-AL. Pr: 0.5386
MdPRX9	SP	0.000241	0.999717	2.8e-05	1.3e-05	2e-06	CS pos: 24-25. TNA-LS. Pr: 0.5133
MdPRX10	SP	0.000128	0.999866	2e-06	4e-06	1e-06	CS pos: 22-23. CFC-DK. Pr: 0.9694
MdPRX11	OTHER	0.977031	0.004938	0.017762	0.000241	2.8e-05
MdPRX12	SP	0.000892	0.999107	0	0	0	CS pos: 29-30. GDA-QL. Pr: 0.6290
MdPRX13	SP	4e-05	0.99996	0	0	0	CS pos: 30-31. VDA-QL. Pr: 0.8955
MdPRX14	SP	0.000505	0.999495	0	0	0	CS pos: 30-31. GDA-QL. Pr: 0.6505
MdPRX15	SP	0.097049	0.899899	0.002851	0.00019	1.1e-05	CS pos: 30-31. VLG-NS. Pr: 0.7824
MdPRX16	SP	0.00021	0.996543	0.000507	0.002738	2e-06	CS pos: 24-25. SNA-QL. Pr: 0.8694
MdPRX17	SP	0.000219	0.995256	0.000435	0.004086	4e-06	CS pos: 24-25. SNA-QL. Pr: 0.8973
MdPRX18	SP	0.021994	0.977142	0.000837	2.5e-05	1e-06	CS pos: 28-29. AKA-QL. Pr: 0.7588
MdPRX19	mTP	0.370678	0.000621	0.625243	0.000304	0.003154	CS pos: 43-44. KRG-LH. Pr: 0.2363
MdPRX20	SP	0.001608	0.988892	9.2e-05	0.009302	0.000105	CS pos: 32-33. CTA-QL. Pr: 0.6145
MdPRX21	OTHER	0.563366	0.33673	0.03345	0.005618	0.060836
MdPRX22	OTHER	0.900475	0.095086	0.003877	0.000561	1e-06
MdPRX23	SP	0.000863	0.998803	6.5e-05	0.000268	1e-06	CS pos: 27-28. SSA-LE. Pr: 0.4298
MdPRX24	SP	0.025643	0.973304	0.000989	5.5e-05	1e-05	CS pos: 25-26. ANG-LS. Pr: 0.7851
MdPRX25	SP	0.000736	0.999246	1.5e-05	0	1e-06	CS pos: 21-22. CEG-GQ. Pr: 0.7656
MdPRX26	SP	0.001447	0.998423	0.000113	1.4e-05	2e-06	CS pos: 29-30. VSA-DG. Pr: 0.6329
MdPRX27	SP	0.003308	0.996593	8.9e-05	2e-06	7e-06	CS pos: 29-30. GKS-EL. Pr: 0.8466
MdPRX28	SP	0.006299	0.993183	0.000189	0.000322	7e-06	CS pos: 30-31. ASA-QL. Pr: 0.5907
MdPRX29	OTHER	0.911575	0.02654	0.012418	0.047793	0.001675
MdPRX30	SP	0.007061	0.992923	1.3e-05	0	3e-06	CS pos: 25-26. VHM-YP. Pr: 0.8948
MdPRX31	SP	0.002749	0.995326	0.001662	9.2e-05	0.000172	CS pos: 25-26. GES-ER. Pr: 0.7940
MdPRX32	SP	0.000175	0.999823	2e-06	0	1e-06	CS pos: 22-23. SSS-YP. Pr: 0.5647
MdPRX33	SP	0.001474	0.998162	0.000222	0.000126	1.6e-05	CS pos: 31-32. STA-IS. Pr: 0.5919
MdPRX34	SP	5.7e-05	0.999941	2e-06	0	0	CS pos: 26-27. CFA-ES. Pr: 0.7407
MdPRX35	lTP	0.466592	5.7e-05	0.020219	0.037607	0.475525	CS pos lTP: 91-92. VLA-AV. Pr: 0.1647; CS pos cTP: 13-14. Pr: 0.1382
MdPRX36	SP	0.006578	0.993411	4e-06	4e-06	4e-06	CS pos: 18-19. SES-QL. Pr: 0.9356
MdPRX37	SP	0.001774	0.998223	1e-06	1e-06	1e-06	CS pos: 18-19. SES-KL. Pr: 0.9364
MdPRX38	OTHER	0.576042	0.400993	0.012705	0.008699	0.001561
MdPRX39	SP	0.002061	0.946021	0.04358	0.007979	0.000359	CS pos: 23-24. TNA-QL. Pr: 0.9321
MdPRX40	SP	0.001183	0.998378	0.000392	4.2e-05	4e-06	CS pos: 28-29. VKS-DG. Pr: 0.8411
MdPRX41	SP	0.018515	0.97988	0.001495	0.0001	1.1e-05	CS pos: 27-28. VHS-QL. Pr: 0.9331
MdPRX42	SP	0.000156	0.999784	5.7e-05	3e-06	0	CS pos: 25-26. SAA-HL. Pr: 0.7144
MdPRX43	SP	0.000968	0.999022	9e-06	1e-06	0	CS pos: 29-30. STA-DL. Pr: 0.2992
MdPRX44	SP	0.000295	0.999697	7e-06	1e-06	0	CS pos: 20-21. ADG-QL. Pr: 0.4917
MdPRX45	SP	0.003635	0.995117	0.001062	0.000177	8e-06	CS pos: 25-26. CQG-QL. Pr: 0.7978
MdPRX46	SP	0.001719	0.997815	0.000406	5.1e-05	8e-06	CS pos: 27-28. VQG-QG. Pr: 0.6620
MdPRX47	SP	0.048621	0.925605	0.024551	0.00107	0.000153	CS pos: 27-28. VQG-QG. Pr: 0.5981
MdPRX48	OTHER	0.965879	0.030016	0.001979	0.002018	0.000108
MdPRX49	OTHER	0.642714	0.356761	0.000519	2e-06	3e-06
MdPRX50	SP	6.4e-05	0.999824	2.1e-05	6.2e-05	2.9e-05	CS pos: 23-24. AES-RL. Pr: 0.9200
MdPRX51	SP	0.001259	0.998689	4.6e-05	6e-06	0	CS pos: 23-24. SEA-QL. Pr: 0.9534
MdPRX52	SP	2.1e-05	0.999979	0	0	0	CS pos: 26-27. SNA-QK. Pr: 0.9649
MdPRX53	SP	0.000101	0.999858	3.7e-05	3e-06	1e-06	CS pos: 24-25. SEA-QS. Pr: 0.6100
MdPRX54	SP	0.002104	0.997484	0.000319	6.5e-05	2.8e-05	CS pos: 25-26. GES-ER. Pr: 0.8315
MdPRX55	SP	0.005656	0.993614	0.000387	0.0003	4.3e-05	CS pos: 25-26. VSS-TK. Pr: 0.7956
MdPRX56	SP	0.000642	0.999356	2e-06	0	0	CS pos: 22-23. SSS-YP. Pr: 0.5344
MdPRX57	SP	0.000313	0.999679	5e-06	1e-06	3e-06	CS pos: 27-28. CFA-TE. Pr: 0.6512
MdPRX58	OTHER	0.930709	0.006475	0.00486	0.007805	0.050151
MdPRX59	SP	0.000232	0.994087	0.000288	0.005388	6e-06	CS pos: 24-25. VNA-QL. Pr: 0.9153
MdPRX60	SP	0.026325	0.968756	0.004832	8.5e-05	2e-06	CS pos: 28-29. AKA-QL. Pr: 0.6927
MdPRX61	SP	0.013878	0.976328	0.009544	0.000199	5.2e-05	CS pos: 24-25. SSA-QL. Pr: 0.6444
MdPRX62	SP	0.00079	0.996045	0.000231	0.002889	4.5e-05	CS pos: 24-25. TSA-QL. Pr: 0.7308
MdPRX63	SP	0.000193	0.989303	0.000852	0.009632	2e-05	CS pos: 26-27. TSA-NL. Pr: 0.9001
MdPRX64	SP	0.001214	0.992247	0.000675	0.005695	0.000169	CS pos: 30-31. SSA-QL. Pr: 0.4173
MdPRX65	SP	0.029921	0.969496	0.000536	3.7e-05	1e-05	CS pos: 25-26. AKG-LS. Pr: 0.7005
MdPRX66	SP	0.025832	0.973292	0.000189	0.000625	6.2e-05	CS pos: 29-30. ASA-QL. Pr: 0.3516
MdPRX67	OTHER	0.992212	0.007257	0.000523	4e-06	4e-06
MdPRX68	SP	0.000153	0.99966	8.5e-05	0.000101	1e-06	CS pos: 26-27. SSA-AP. Pr: 0.4729
MdPRX69	SP	0.002833	0.993672	0.003417	7.4e-05	5e-06	CS pos: 31-32. SEA-QL. Pr: 0.8975
MdPRX70	SP	0.003182	0.993235	0.003503	7.6e-05	5e-06	CS pos: 31-32. SEA-QL. Pr: 0.8984
MdPRX71	SP	0.000231	0.999767	2e-06	0	0	CS pos: 28-29. LRA-GD. Pr: 0.8939
MdPRX72	SP	0.000233	0.999741	1.3e-05	7e-06	5e-06	CS pos: 26-27. THA-QL. Pr: 0.8813
MdPRX73	SP	0.005872	0.9941	1.1e-05	1.7e-05	1e-06	CS pos: 27-28. CSA-DE. Pr: 0.9223
MdPRX74	SP	0.002164	0.997834	1e-06	1e-06	0	CS pos: 27-28. CSA-DE. Pr: 0.9544
MdPRX75	SP	0.000145	0.999854	1e-06	0	0	CS pos: 26-27. IIG-GG. Pr: 0.5612
MdPRX76	SP	0.051006	0.948948	1.8e-05	1.9e-05	1e-05	CS pos: 21-22. VEG-QG. Pr: 0.5742
MdPRX77	SP	0.001075	0.998921	4e-06	0	0	CS pos: 24-25. CHG-GG. Pr: 0.8968
MdPRX78	SP	0.001456	0.99853	1.3e-05	1e-06	1e-06	CS pos: 23-24. ACA-QL. Pr: 0.8334
MdPRX79	SP	0.004557	0.995363	6.4e-05	5e-06	1e-05	CS pos: 20-21. VVA-DL. Pr: 0.8783
MdPRX80	SP	0.007017	0.992873	2.3e-05	1.7e-05	7e-05	CS pos: 18-19. SES-KL. Pr: 0.9417
MdPRX81	SP	0.000197	0.999643	0.000117	4.3e-05	1e-06	CS pos: 25-26. SAA-HP. Pr: 0.5581
MdPRX82	SP	0.227181	0.766741	0.005663	0.000338	7.7e-05	CS pos: 42-43. TFA-QL. Pr: 0.9578
MdPRX83	SP	0.001274	0.998491	0.000203	2.9e-05	3e-06	CS pos: 20-21. AKG-QL. Pr: 0.5705
MdPRX84	SP	0.00036	0.99963	7e-06	2e-06	0	CS pos: 24-25. TNA-LS. Pr: 0.5455
MdPRX85	SP	0.466704	0.532668	0.0001	0.000323	0.000204	CS pos: 49-50. CFC-DK. Pr: 0.9510
MdPRX86	SP	0.011183	0.988812	5e-06	0	0	CS pos: 24-25. MFC-QL. Pr: 0.9040
MdPRX87	SP	0.000544	0.999438	1.8e-05	0	0	CS pos: 29-30. TSA-QL. Pr: 0.8638
MdPRX88	SP	0.056086	0.939464	0.004028	0.000153	0.000269	CS pos: 23-24. LRP-HY. Pr: 0.1685
MdPRX89	OTHER	0.576246	0.406848	0.002061	0.009506	0.005339
MdPRX90	SP	0.000938	0.999061	1e-06	0	0	CS pos: 30-31. CAG-DP. Pr: 0.5204
MdPRX91	SP	0.000634	0.999251	7.7e-05	2.7e-05	1.1e-05	CS pos: 24-25. ATA-SR. Pr: 0.6453
MdPRX92	SP	0.003362	0.995832	0.000294	0.000398	0.000114	CS pos: 28-29. TEA-AG. Pr: 0.9555
MdPRX93	SP	0.006296	0.991938	0.000849	0.000912	5e-06	CS pos: 24-25. AYS-AD. Pr: 0.8770
MdPRX94	SP	0.004194	0.995593	0.000173	2.3e-05	1.7e-05	CS pos: 21-22. VEG-QG. Pr: 0.4884
MdPRX95	SP	0.00429	0.995506	0.000187	1.5e-05	1e-06	CS pos: 24-25. CNG-GL. Pr: 0.6537
MdPRX96	SP	2.1e-05	0.999976	1e-06	3e-06	1e-06	CS pos: 23-24. AES-QL. Pr: 0.9002
MdPRX97	SP	0.00062	0.999377	3e-06	0	0	CS pos: 23-24. SEA-QL. Pr: 0.9483
MdPRX98	SP	0.00108	0.998915	5e-06	0	0	CS pos: 23-24. SEA-QL. Pr: 0.9491
MdPRX99	SP	0.005148	0.994146	0.000527	0.000145	3.3e-05	CS pos: 21-22. SNA-QL. Pr: 0.5579
