# Supplementary material for: Genomewide analysis of the Class III peroxidase gene family in apple (Malus domestica)
Source: PeerJ. 2025 Aug 18;13:e19741. doi: 10.7717/peerj.19741 (PMC12369634; doi:10.7717/peerj.19741)
Supplement: Supplemental Information 8 [file peerj-13-19741-s008.xls]

## Sheet: Addtional File 5 Batch smart
MdPRX ID	Start	End
MdPRX1	1	21	signal_peptide
MdPRX1	40	286	Pfam:peroxidase
MdPRX2	1	18	signal_peptide
MdPRX2	33	282	Pfam:peroxidase
MdPRX3	1	19	signal_peptide
MdPRX3	33	274	Pfam:peroxidase
MdPRX4	65	306	Pfam:peroxidase
MdPRX5	1	23	signal_peptide
MdPRX5	41	282	Pfam:peroxidase
MdPRX6	1	23	signal_peptide
MdPRX6	41	283	Pfam:peroxidase
MdPRX7	1	30	signal_peptide
MdPRX7	46	281	Pfam:peroxidase
MdPRX8	1	30	signal_peptide
MdPRX8	45	293	Pfam:peroxidase
MdPRX9	1	24	signal_peptide
MdPRX9	37	286	Pfam:peroxidase
MdPRX10	1	22	signal_peptide
MdPRX10	46	294	Pfam:peroxidase
MdPRX11	1	250	Pfam:peroxidase
MdPRX12	1	29	signal_peptide
MdPRX12	47	280	Pfam:peroxidase
MdPRX13	1	30	signal_peptide
MdPRX13	48	301	Pfam:peroxidase
MdPRX14	1	30	signal_peptide
MdPRX14	48	301	Pfam:peroxidase
MdPRX15	13	30	transmembrane_domain
MdPRX15	51	262	Pfam:peroxidase
MdPRX16	1	24	signal_peptide
MdPRX16	42	288	Pfam:peroxidase
MdPRX17	1	24	signal_peptide
MdPRX17	42	288	Pfam:peroxidase
MdPRX18	1	28	signal_peptide
MdPRX18	46	295	Pfam:peroxidase
MdPRX19	61	83	transmembrane_domain
MdPRX19	106	347	Pfam:peroxidase
MdPRX20	1	32	signal_peptide
MdPRX20	50	294	Pfam:peroxidase
MdPRX21	29	48	transmembrane_domain
MdPRX21	70	313	Pfam:peroxidase
MdPRX22	1	122	Pfam:peroxidase
MdPRX23	1	26	signal_peptide
MdPRX23	47	290	Pfam:peroxidase
MdPRX24	1	18	signal_peptide
MdPRX24	42	279	Pfam:peroxidase
MdPRX25	1	21	signal_peptide
MdPRX25	40	286	Pfam:peroxidase
MdPRX26	1	19	signal_peptide
MdPRX26	57	303	Pfam:peroxidase
MdPRX27	1	23	signal_peptide
MdPRX27	47	290	Pfam:peroxidase
MdPRX28	1	30	signal_peptide
MdPRX28	48	288	Pfam:peroxidase
MdPRX29	42	269	Pfam:peroxidase
MdPRX30	1	25	signal_peptide
MdPRX30	50	297	Pfam:peroxidase
MdPRX31	1	25	signal_peptide
MdPRX31	84	360	Pfam:peroxidase
MdPRX32	1	19	signal_peptide
MdPRX32	78	317	Pfam:peroxidase
MdPRX33	1	31	signal_peptide
MdPRX33	64	315	Pfam:peroxidase
MdPRX34	1	26	signal_peptide
MdPRX34	51	295	Pfam:peroxidase
MdPRX35	76	98	transmembrane_domain
MdPRX35	124	378	Pfam:peroxidase
MdPRX36	1	18	signal_peptide
MdPRX36	33	285	Pfam:peroxidase
MdPRX37	1	18	signal_peptide
MdPRX37	32	285	Pfam:peroxidase
MdPRX38	21	38	transmembrane_domain
MdPRX38	60	300	Pfam:peroxidase
MdPRX39	1	23	signal_peptide
MdPRX39	41	283	Pfam:peroxidase
MdPRX40	1	28	signal_peptide
MdPRX40	47	290	Pfam:peroxidase
MdPRX41	1	27	signal_peptide
MdPRX41	45	293	Pfam:peroxidase
MdPRX42	1	19	signal_peptide
MdPRX42	58	286	Pfam:peroxidase
MdPRX43	1	28	signal_peptide
MdPRX43	47	292	Pfam:peroxidase
MdPRX44	1	18	signal_peptide
MdPRX44	38	279	Pfam:peroxidase
MdPRX45	1	25	signal_peptide
MdPRX45	44	286	Pfam:peroxidase
MdPRX46	1	27	signal_peptide
MdPRX46	48	292	Pfam:peroxidase
MdPRX47	1	27	signal_peptide
MdPRX47	48	290	Pfam:peroxidase
MdPRX48	1	182	Pfam:peroxidase
MdPRX49	1	34	signal_peptide
MdPRX49	53	304	Pfam:peroxidase
MdPRX50	1	23	signal_peptide
MdPRX50	37	290	Pfam:peroxidase
MdPRX51	1	23	signal_peptide
MdPRX51	39	287	Pfam:peroxidase
MdPRX52	1	26	signal_peptide
MdPRX52	43	290	Pfam:peroxidase
MdPRX53	1	24	signal_peptide
MdPRX53	50	293	Pfam:peroxidase
MdPRX54	1	25	signal_peptide
MdPRX54	82	357	Pfam:peroxidase
MdPRX55	1	25	signal_peptide
MdPRX55	67	307	Pfam:peroxidase
MdPRX56	1	19	signal_peptide
MdPRX56	78	317	Pfam:peroxidase
MdPRX57	1	27	signal_peptide
MdPRX57	53	297	Pfam:peroxidase
MdPRX58	47	69	transmembrane_domain
MdPRX58	83	322	Pfam:peroxidase
MdPRX59	1	20	signal_peptide
MdPRX59	42	288	Pfam:peroxidase
MdPRX60	1	28	signal_peptide
MdPRX60	46	295	Pfam:peroxidase
MdPRX61	1	24	signal_peptide
MdPRX61	42	283	Pfam:peroxidase
MdPRX62	1	24	signal_peptide
MdPRX62	42	284	Pfam:peroxidase
MdPRX63	1	18	signal_peptide
MdPRX63	44	286	Pfam:peroxidase
MdPRX64	7	29	transmembrane_domain
MdPRX64	48	291	Pfam:peroxidase
MdPRX65	1	18	signal_peptide
MdPRX65	42	279	Pfam:peroxidase
MdPRX66	1	29	signal_peptide
MdPRX66	47	287	Pfam:peroxidase
MdPRX67	1	223	Pfam:peroxidase
MdPRX68	1	26	signal_peptide
MdPRX68	44	290	Pfam:peroxidase
MdPRX69	1	31	signal_peptide
MdPRX69	49	291	Pfam:peroxidase
MdPRX70	1	31	signal_peptide
MdPRX70	49	292	Pfam:peroxidase
MdPRX71	1	28	signal_peptide
MdPRX71	49	300	Pfam:peroxidase
MdPRX72	1	26	signal_peptide
MdPRX72	41	293	Pfam:peroxidase
MdPRX73	1	27	signal_peptide
MdPRX73	53	302	Pfam:peroxidase
MdPRX74	1	27	signal_peptide
MdPRX74	53	302	Pfam:peroxidase
MdPRX75	1	19	signal_peptide
MdPRX75	54	299	Pfam:peroxidase
MdPRX76	1	21	signal_peptide
MdPRX76	36	288	Pfam:peroxidase
MdPRX77	1	24	signal_peptide
MdPRX77	43	277	Pfam:peroxidase
MdPRX78	1	23	signal_peptide
MdPRX78	41	290	Pfam:peroxidase
MdPRX79	1	20	signal_peptide
MdPRX79	38	280	Pfam:peroxidase
MdPRX80	1	18	signal_peptide
MdPRX80	33	285	Pfam:peroxidase
MdPRX80	350	603	Pfam:peroxidase
MdPRX81	1	25	signal_peptide
MdPRX81	76	325	Pfam:peroxidase
MdPRX82	56	309	Pfam:peroxidase
MdPRX83	1	20	signal_peptide
MdPRX83	38	280	Pfam:peroxidase
MdPRX84	1	24	signal_peptide
MdPRX84	37	286	Pfam:peroxidase
MdPRX85	1	49	signal_peptide
MdPRX85	73	321	Pfam:peroxidase
MdPRX86	1	24	signal_peptide
MdPRX86	42	289	Pfam:peroxidase
MdPRX87	28	278	Pfam:peroxidase
MdPRX88	1	18	signal_peptide
MdPRX88	33	283	Pfam:peroxidase
MdPRX89	33	52	transmembrane_domain
MdPRX89	70	316	Pfam:peroxidase
MdPRX90	1	30	signal_peptide
MdPRX90	50	303	Pfam:peroxidase
MdPRX91	1	24	signal_peptide
MdPRX91	41	294	Pfam:peroxidase
MdPRX92	1	28	signal_peptide
MdPRX92	50	304	Pfam:peroxidase
MdPRX93	1	24	signal_peptide
MdPRX93	50	301	Pfam:peroxidase
MdPRX94	1	21	signal_peptide
MdPRX94	36	288	Pfam:peroxidase
MdPRX95	1	24	signal_peptide
MdPRX95	45	287	Pfam:peroxidase
MdPRX96	1	23	signal_peptide
MdPRX96	37	290	Pfam:peroxidase
MdPRX97	1	23	signal_peptide
MdPRX97	38	286	Pfam:peroxidase
MdPRX98	1	23	signal_peptide
MdPRX98	41	287	Pfam:peroxidase
MdPRX99	1	21	signal_peptide
MdPRX99	36	278	Pfam:peroxidase
